# Supplementary material
Source: Springer Nature journal article supplement (https://www.springermedizin.de/resource/supplementary/12907_2008_65_MOESM7_ESM.pdf/9525048)

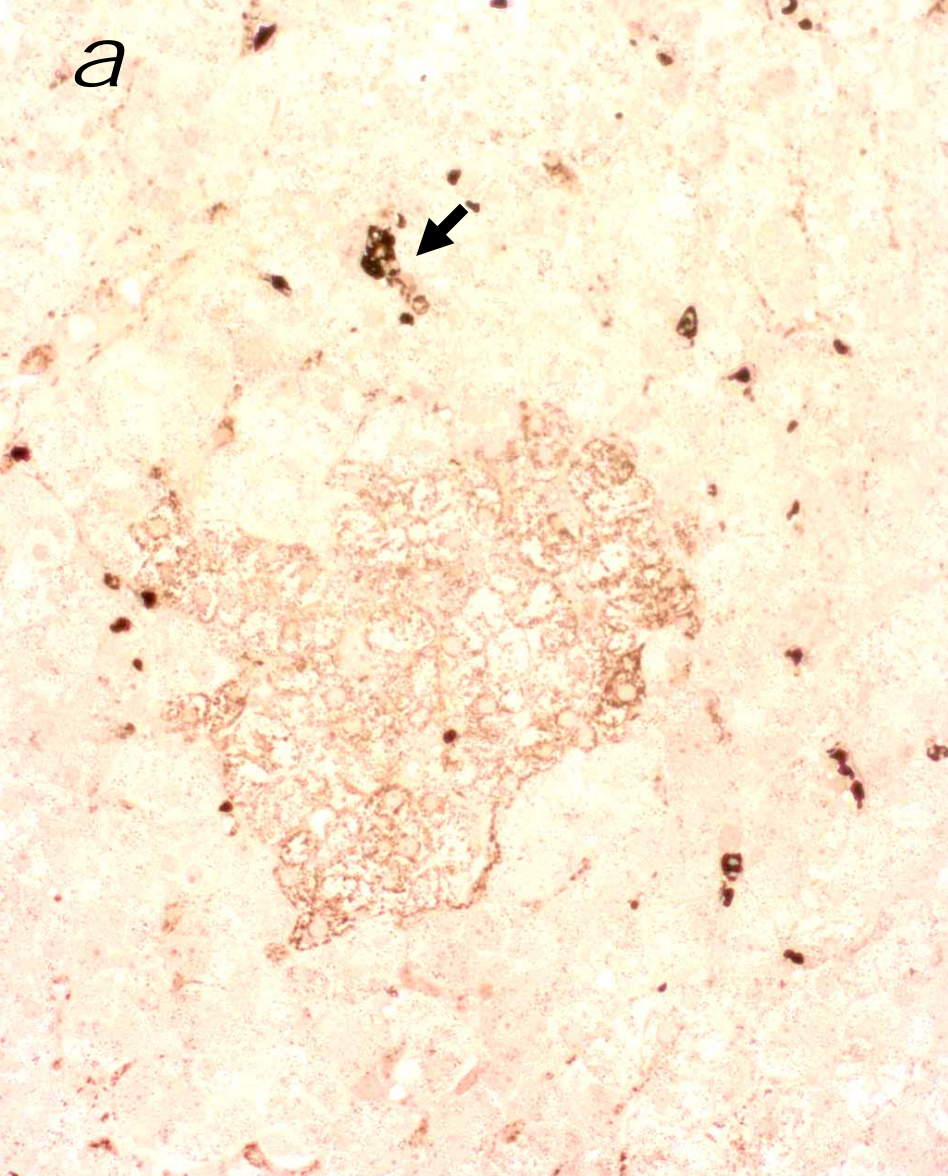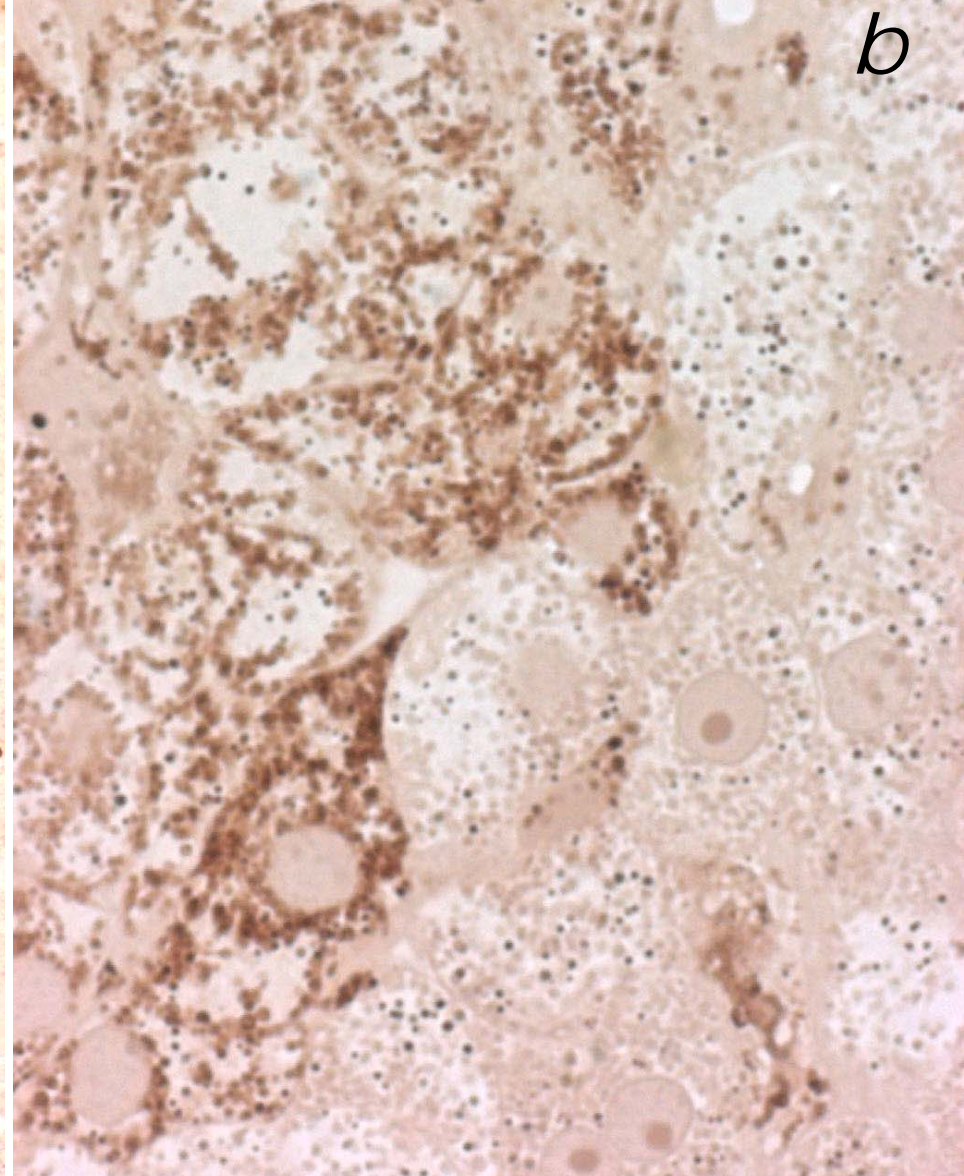

Supplement: MOESM7 [file 9525048]
